# Supplementary material for: Exploring the Zoonotic Potential of Mycobacterium avium Subspecies paratuberculosis through Comparative Genomics
Source: PLoS One. 2011 Jul 22;6(7):e22171. doi: 10.1371/journal.pone.0022171 (PMC3142125; doi:10.1371/journal.pone.0022171)
Supplement: Table S5 — A full description of contigs and their positions on the M. avium subspecies hominissuis genome which are unique to the bovine isolate CLIJ644 compared to the K10 reference. (XLS) [file pone.0022171.s005.xls]

## Sheet: Sheet1
Supplementary Table 5. A full description of contigs and their positions on the M. avium subspecies hominissuis genome which are unique to the bovine isolate CLIJ644 compared to the K10 reference
Contig	Length	Coverage	Top BLAST hit	Position in genome
NODE62	186	10.7634	Mycobacterium avium subspecies hominissuis strain 104	2081157..2081364
NODE17	278	71.6907	Mycobacterium avium subspecies hominissuis strain 104	3167081..3166782
NODE2	87	34.8736	Mycobacterium avium subspecies hominissuis strain 104	3176640..3176727
NODE10	273	57.2784	Mycobacterium avium subspecies hominissuis strain 104	3176661..3176376
NODE18	1128	57.5612	Mycobacterium avium subspecies hominissuis strain 104	3176919..3178068
NODE21	500	46.666	Mycobacterium avium subspecies hominissuis strain 104	3178073..3178589
NODE23	264	39.4242	Mycobacterium avium subspecies hominissuis strain 104	3179030..3178746
NODE19	130	54.6077	Mycobacterium avium subspecies hominissuis strain 104	3179227..3179076
NODE26	93	53.2903	Mycobacterium avium subspecies hominissuis strain 104	3179488..3179374
NODE11	248	47.6089	Mycobacterium avium subspecies hominissuis strain 104	3179893..3179624
NODE24	162	34.858	Mycobacterium avium subspecies hominissuis strain 104	3180004..3180187
NODE22	126	26.1984	Mycobacterium avium subspecies hominissuis strain 104	3180025..3179878
NODE7	85	45.3882	Mycobacterium avium subspecies hominissuis strain 104	3180195..3180300
NODE8	369	45.122	Mycobacterium avium subspecies hominissuis strain 104	3180669..3180279
NODE16	693	43.71	Mycobacterium avium subspecies hominissuis strain 104	3181365..3180651
NODE33	282	48.2624	Mycobacterium avium subspecies hominissuis strain 104	3181385..3181685
